# Supplementary material for: Formation of somatosensory detour circuits mediates functional recovery following dorsal column injury
Source: PubMed Central journal article supplement (PMC7331809; doi:10.1038/s41598-020-67866-x), 2020-07-02
Supplement: 41598_2020_67866_MOESM1_ESM.pdf [file 41598_2020_67866_MOESM1_ESM.pdf]

# Formation of somatosensory detour circuits mediates functional recovery following dorsal column injury.

Charlène Granier<sup>1,2,3,#</sup>, Julian Schwarting<sup>1,2,#</sup>, Evangelia Fourli<sup>1,2,#</sup>, Fabian Laage-Gaupp<sup>1,2</sup>, Alexandru A. Hennrich<sup>4</sup>, Anja Schmalz<sup>1,2</sup>, Anne Jacobi<sup>1,2</sup>, Marta Wesolowski<sup>1,2,3</sup>, Karl Klaus Conzelmann<sup>4</sup> and Florence M Bareyre<sup>1,2,5</sup>

## Supplementary information

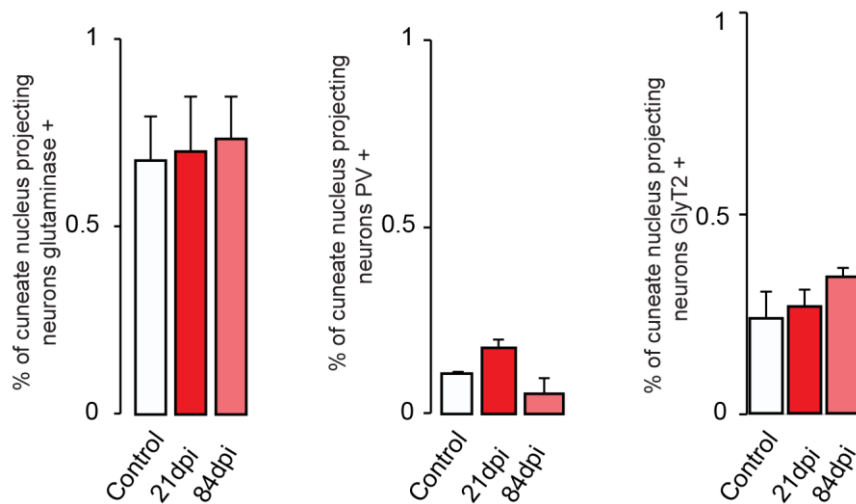

### Supplementary Figure 1. Characterization of cuneate nucleus projecting neurons.

Graphs indicating the percentage of cuneate nucleus projecting neurons positive for glutaminase, parvalbumin (PV), glycinergic transporter 2 (GlyT2).
